# Supplementary material
Source: publisher figshare collection journal article supplement (https://acs.figshare.com/ndownloader/files/24890111)
Supplement: Supplementary file 1 [file 24890111]

## Supporting Information

### **Tuning Surface Passivating Ligand Anchoring Position Enables Phase Robustness in CsPbI<sub>3</sub> Perovskite Quantum Dot Solar Cells**

*Jahangeer Khan,<sup>1</sup> Xuliang Zhang,<sup>1</sup> Jianyu Yuan,<sup>\*,1</sup> Yao Wang,<sup>1</sup> Guozheng Shi,<sup>1</sup> Robert  
Patterson,<sup>2</sup> Junwei Shi,<sup>1</sup> Xufeng Ling,<sup>1</sup> Long Hu,<sup>2</sup> Tom Wu,<sup>2</sup> Songyuan Dai,<sup>\*,4</sup> Wanli  
Ma,<sup>\*,1</sup>*

<sup>1</sup>Institute of Functional Nano & Soft Materials (FUNSOM), Jiangsu Key Laboratory for Carbon-Based Functional Materials & Devices, Joint International Research Laboratory of Carbon-Based Functional Materials and Devices, Soochow University, 199 Ren-Ai Road, Suzhou, Jiangsu, 215123, P. R. China.

<sup>2</sup>Australian Centre for Advanced Photovoltaics, School of Materials Science and Engineering, University of New South Wales (UNSW), Sydney, NSW, 2052, Australia.

<sup>3</sup>State Key Laboratory of Alternate Electrical Power System with Renewable Energy Sources, North China Electric Power University, Beijing, 102206, P. R. China

Email: [jyyuan@suda.edu.cn](mailto:jyyuan@suda.edu.cn) (J. Y.); [sydai@ncepu.edu.cn](mailto:sydai@ncepu.edu.cn) (S.D.) [wlma@suda.edu.cn](mailto:wlma@suda.edu.cn) (W. M.)

## Materials

$\text{Cs}_2\text{CO}_3$  (99.9%), ODE (technical grade 90%), OA (technical grade 90%) and OLA (technical grade 70%) were obtained from Sigma-Aldrich.  $\text{PbI}_2$  (99%) and n-octane (98%) were obtained from Alfa Aesar. MeOAc (anhydrous 99.5%), EtOAc (anhydrous 99.8%) and n-hexane ( $\geq 97.5\%$ ) were obtained from J&K. Ethyl alcohol (analytical reagent, 98%), isopropanol (analytical reagent, 98%), acetone (analytical reagent, 98%) and  $\text{TiCl}_4$  (98%) were obtained from Sinopharm Chemical Reagent Co., Ltd.. PTAA ( $M_n=17,000\text{ g mol}^{-1}$ ) is obtained from Xi'an Polymer Light Technology Corp.

## Instruments

SEM images were obtained by a Zeiss Supra 55 with the extra high tension of 5 kV. PL spectra tested by a Monochromator/Spectrograph (Omni- $\lambda$ 300, Zolix) and an Oscilloscope (GDS-3354, GWINSTEK). TEM images of  $\text{CsPbI}_3$  QDs were recorded by a transmission electron microscope with the type of Tecnai G2 F20 S-Twin. EIS measurements were carried out through Zahner IM6 electrochemical workstation with a frequency between 0.25 MHz and 0.05 Hz under a monochromatic LED (500 nm, 100 mW) light irradiation. XPS were obtained through a Kratos AXIS Ultra DLD ultrahigh vacuum photoemission spectroscopy system, with an Al  $K\alpha$  radiation source.

## Preparation of $\text{CsPbI}_3$ PQDs

1 g of  $\text{Cs}_2\text{CO}_3$ , 4 mL of OA and 100 ml of 1-octadecene (ODE) were put into a 250 ml of three-necked flask and was stirred and vacuumed at 90 °C for 1 h. Then,  $\text{N}_2$  was pumped into the three-necked flask and the reaction temperature went up to 120 °C. Finally, the reaction continued for 50 min to obtain Cs-oleate.

1 g of  $\text{PbI}_2$  and 50 mL of ODE were put into a 250 mL of three-necked flask and was stirred and vacuumed at 90 °C for 1 h. Then,  $\text{N}_2$  was pumped into the three-necked flask followed by the addition of 5 mL of OA and 5 mL of OLA. The three-necked flask was vacuumed again for 1 h until  $\text{N}_2$  was pumped into it again and heated up to 160 °C. Next, 8 mL of preheat clear Cs-oleate was injected into the three-necked flask rapidly and after 5s, the reaction was cooled to 40 °C under ice bath.

### **Purification of $\text{CsPbI}_3$ PQDs**

The  $\text{CsPbI}_3$  PQDs mixture was transferred into a  $\text{N}_2$ -filled glovebox. 30 mL of MeOAc was added into 10 ml of as-prepared  $\text{CsPbI}_3$  PQD solution and centrifuged at 8000 rpm for 5 min aiming at removing ODE, unreacted OA and unreacted OLA. The precipitation was re-dispersed into 3 mL of hexane. Then, 3 mL of MeOAc was added into 3 mL  $\text{CsPbI}_3$  PQD hexane solution and centrifuged at 8000 rpm for 3 min aiming at removing undersized  $\text{CsPbI}_3$  PQDs. Then, all the precipitation was re-dispersed into 20 mL of hexane and centrifuged at 4000 rpm for 5 min. The last precipitation was not needed aiming at removing excess  $\text{PbI}_2$ , excess Cs-oleate and oversized  $\text{CsPbI}_3$  PQDs. The  $\text{CsPbI}_3$  PQDs need to be stored in dark at 0 °C overnight and centrifuged at 4000 rpm for 5 min aiming at removing excess  $\text{PbI}_2$ , Cs-oleate and Pb-oleate to achieve  $\text{CsPbI}_3$  PQD solid. The  $\text{CsPbI}_3$  PQD solid was dispersed into octane for 70 mg/mL to prepare  $\text{CsPbI}_3$  PQD solar cells.

### **The fabrication of $\text{CsPbI}_3$ PQD solar cells**

$\text{TiO}_2$  electron transfer layer was deposited on the FTO substrate by means of chemical bath deposition. Before depositing  $\text{CsPbI}_3$  PQDs, the FTO/ $\text{TiO}_2$  substrates were

treated by UV-zone for about 10 min and transferred to a glove box which atmosphere is 70 % of N<sub>2</sub> and 30 % of O<sub>2</sub>. Then, 15 uL of as-prepared octane solution of CsPbI<sub>3</sub> PQDs was spin coated on the FTO/TiO<sub>2</sub> substrate at 1000 rpm for 15 s and 2000 rpm for 20 s. 150 uL of MeOAc was dropped on the CsPbI<sub>3</sub> PQD layer for 5 s to remove the long chain insulated ligands at the surface of CsPbI<sub>3</sub> PQD and then spun at 2000 rpm for 20 s. This process was needed to repeat five times to obtain thick enough CsPbI<sub>3</sub> CQD film. The film was soaked into solution of ethyl acetate of Py (3  $\mu$ L/mL), 2-MP (0.05 mg/mL) and 4-MP (0.05 mg/mL) and pure MeOAc for 3 s respectively and then blown dry with N<sub>2</sub>. The as-prepared substrate was transferred to a glove box with pure N<sub>2</sub> to deposited hole transfer layer. 15 mg/mL of tris(pentafluorophenyl)borane-doped PTAA toluene solution was spin coated on the as-prepared FTO/TiO<sub>2</sub>/CsPbI<sub>3</sub> PQDs substrate at 3000 rpm for 40 s. Finally, 8 nm of MoO<sub>3</sub> and 120 nm of Ag electrode were deposited by thermal evaporation through a shadow mask to form 0.075 cm<sup>2</sup> devices under a vacuum of  $2 \times 10^{-6}$  mbar.

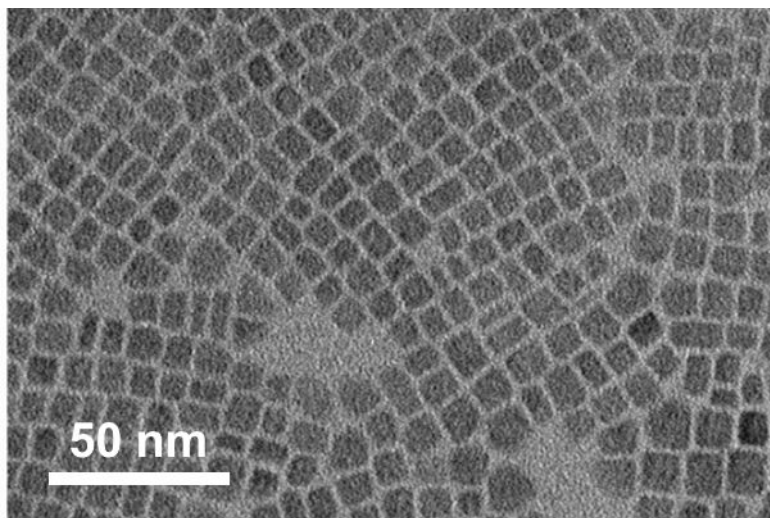

Figure S1. TEM image of purified CsPbI<sub>3</sub> PQDs with an average size around 9 nm.

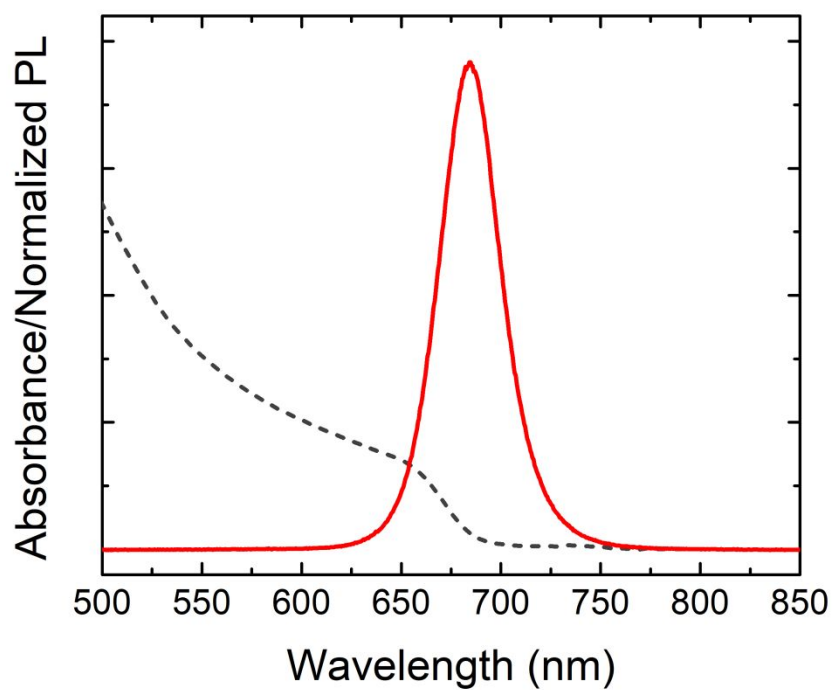

Figure S2. UV-vis absorption and PL spectra of CsPbI<sub>3</sub> PQD solution in hexane.

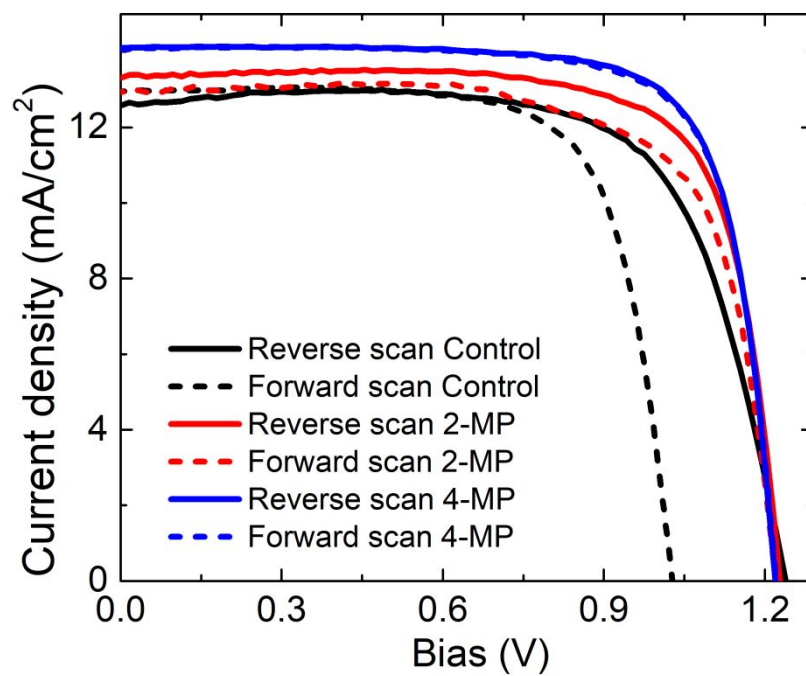

Figure S3. The J-V curves of control, 2-MP and 4-MP post-treated devices under reverse and forward scanning.

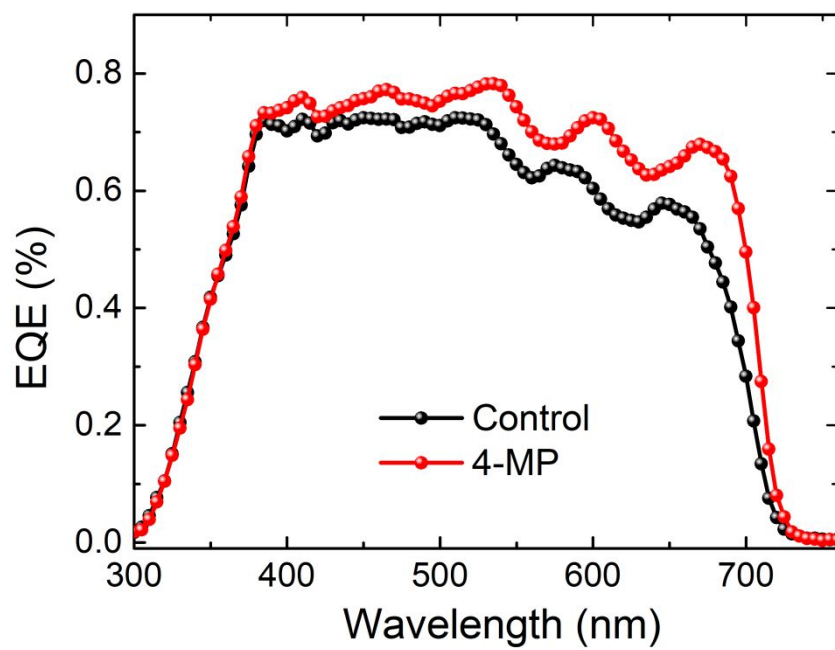

Figure S4. EQE curves of control and optimal 4-MP post-treated devices

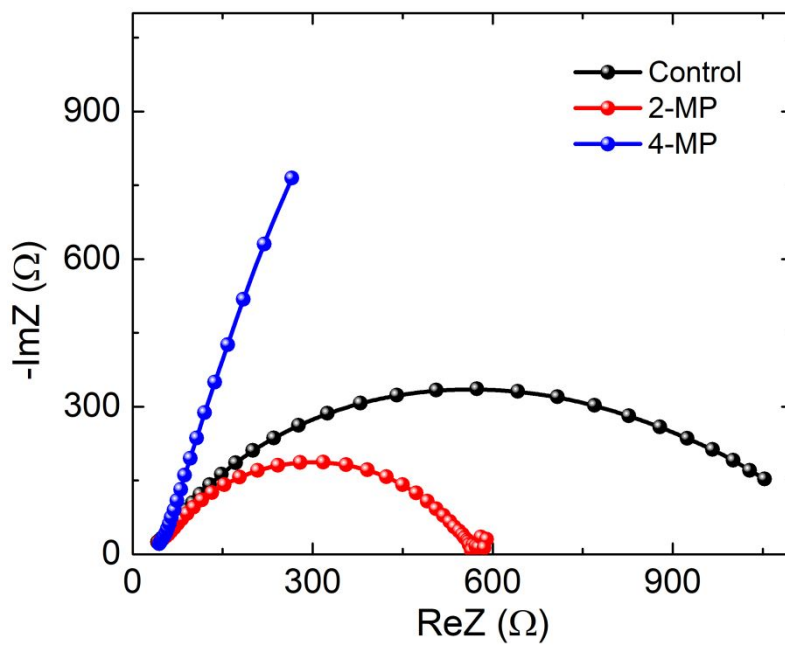

Figure S5. EIS curves of control, 2-MP and 4-MP treated devices under illumination.

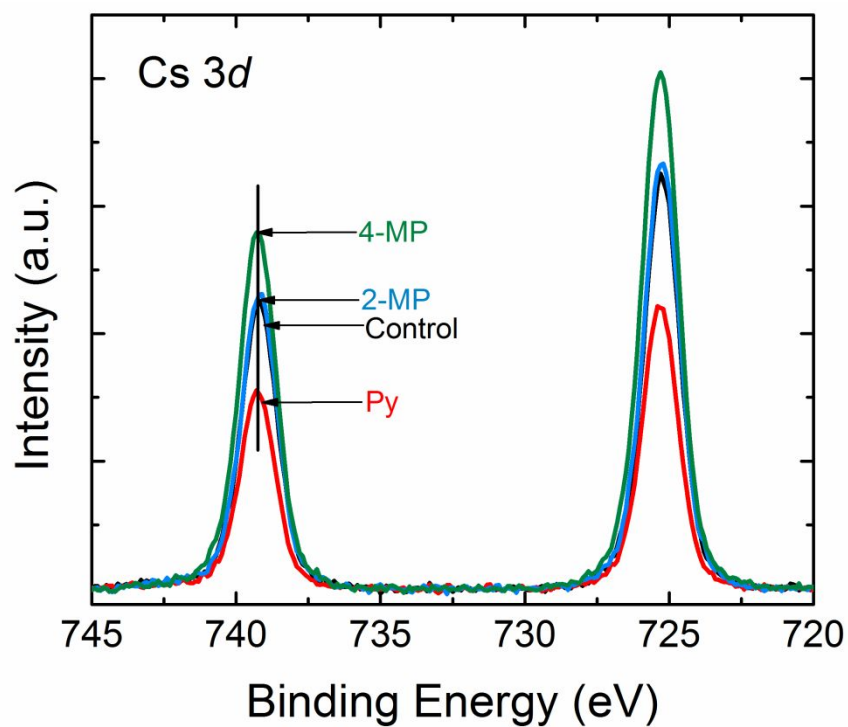

Figure S6. XPS signals of Cs 3d in control, Py, 2-MP and 4-MP post-treated CsPbI<sub>3</sub> PQD films.

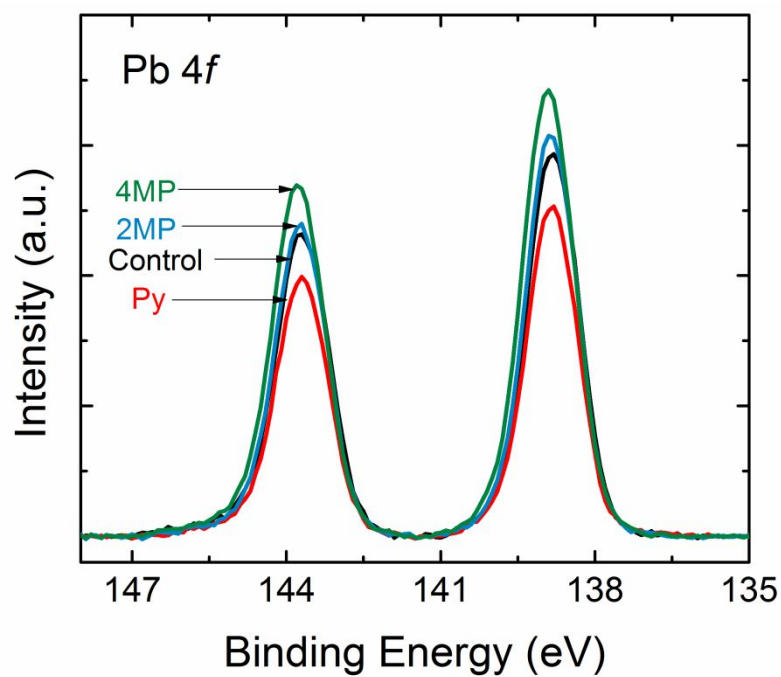

Figure S7. XPS signals of Pb 4f in control, Py, 2-MP and 4-MP post-treated CsPbI<sub>3</sub> PQD films.

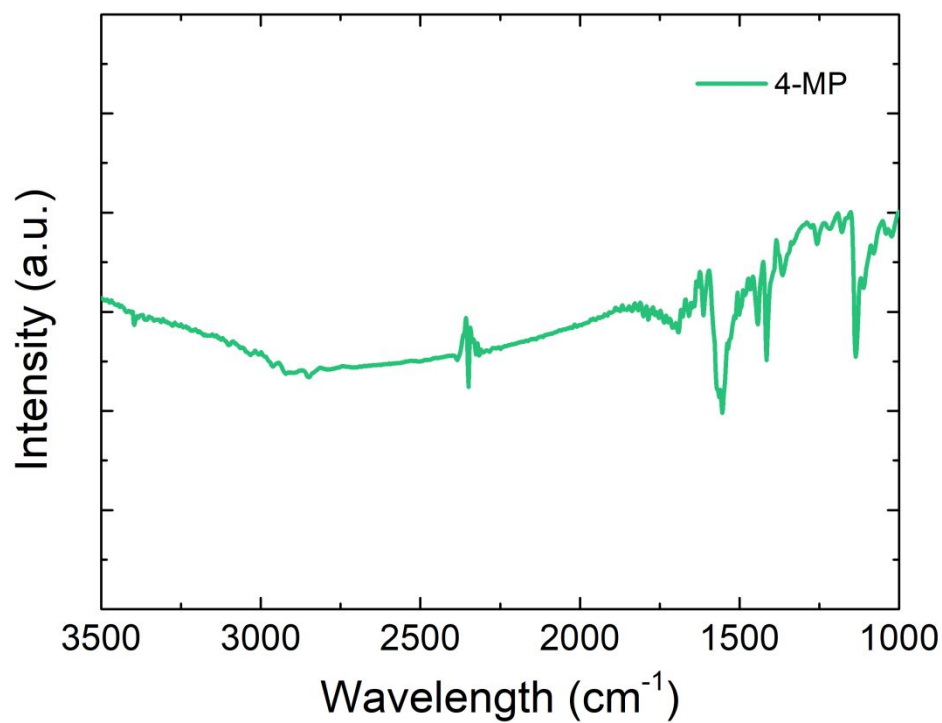

Figure S8. FTIR spectra of neat 4-MP, the stretching vibration of C=N appearing at the region of 1660 to 1430 cm<sup>-1</sup>.

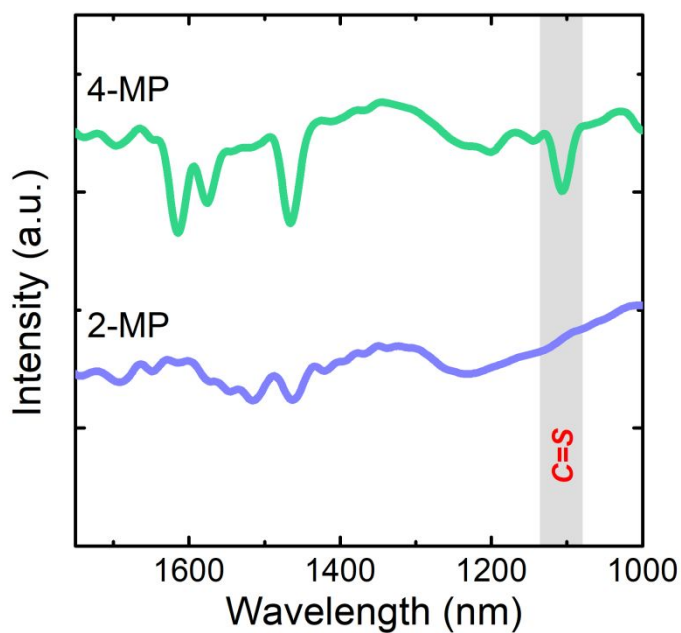

Figure S9. The enlarged FTIR areas of 2-MP and 4-MP treated CsPbI<sub>3</sub> QD films.



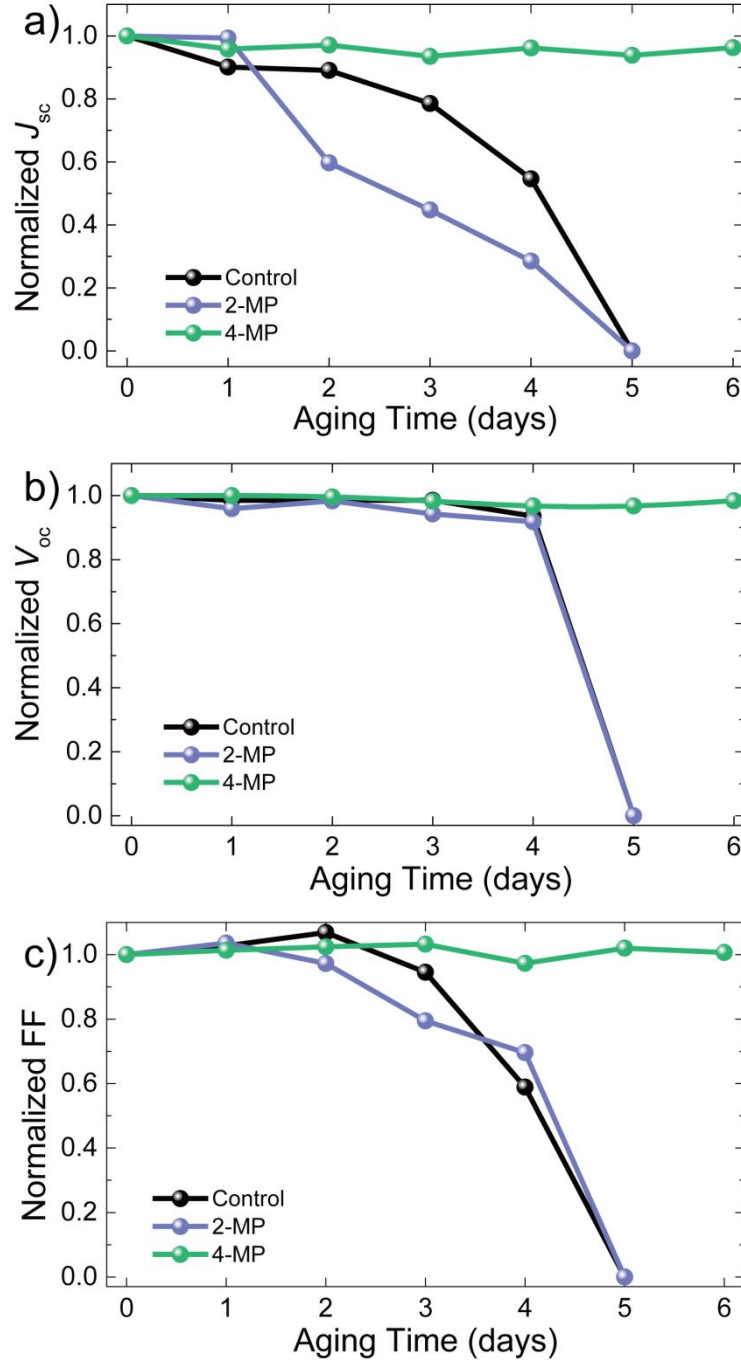

Figure 10.  $J_{sc}$ ,  $V_{oc}$  and FF of control, 2-MP and 4-MP treated CsPbI<sub>3</sub> PQD solar cells as a function of aging under RH of 20-30% at 20-30 °C condition.

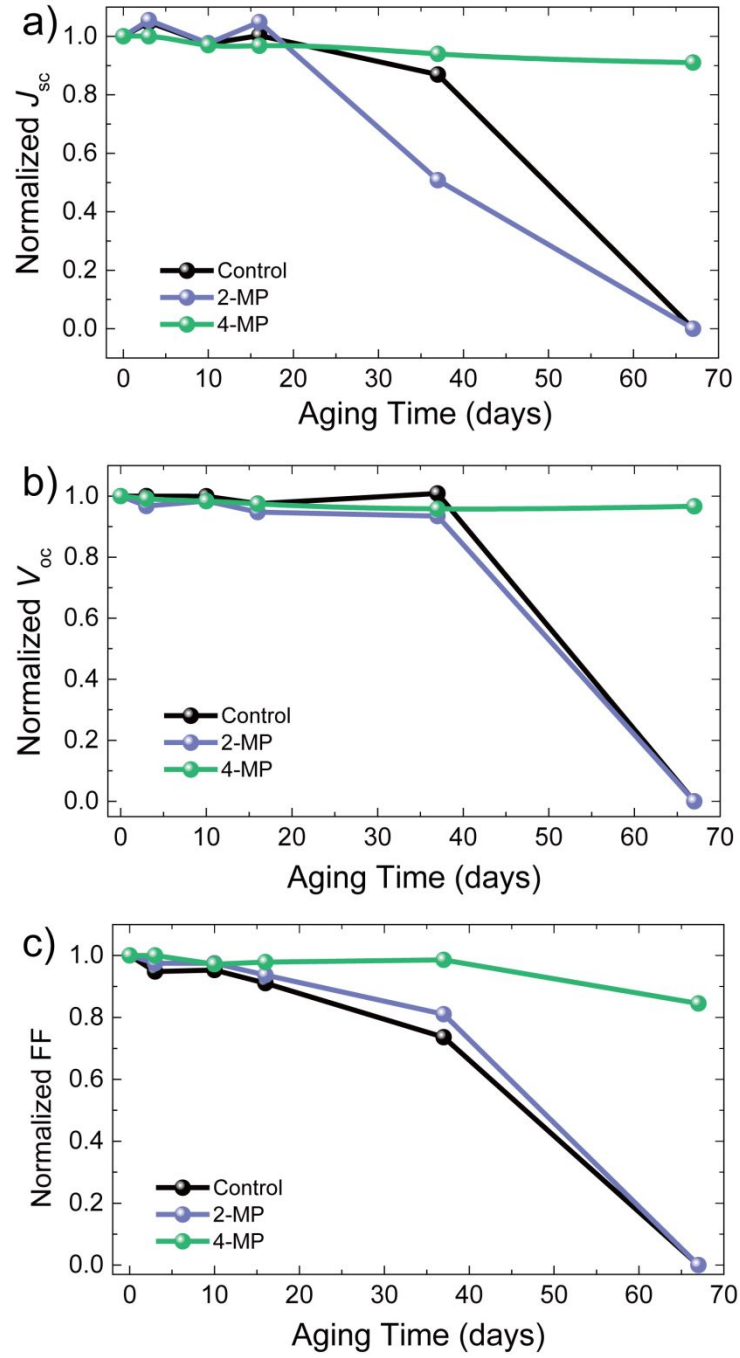

Figure 11.  $J_{sc}$ ,  $V_{oc}$  and FF of control, 2-MP and 4-MP treated CsPbI<sub>3</sub> PQD solar cells as a function of aging under RH 0-5% at 20-30 °C condition.

Table S1. Summary of ambient stability of CsPbI<sub>3</sub>-QD solar cells reported so far

| Device architecture                                            | PCE           | Ambient storage device stability                                                                                 | Reference                            |
|----------------------------------------------------------------|---------------|------------------------------------------------------------------------------------------------------------------|--------------------------------------|
| FTO/TiO <sub>2</sub> /QDs/PTB7/MoO <sub>3</sub> /Ag            | 12.55%        | - RH 20~30%, 25°C<br>- 80% retention for 35 hour                                                                 | Joule 2 (2018) 2450.                 |
| FTO/TiO <sub>2</sub> /QDs/PTAA/Au                              | 11.64%        | - RH 60%, 25°C<br>- 60% retention for 10 hour                                                                    | Adv. Energy Mater. 8 (2018) 1800007. |
| FTO/TiO <sub>2</sub> /QDs/PTAA /MoO <sub>x</sub> /Ag           | 12.30%        | - RH 20~30%, 25°C<br>- 20% retention for 50 hour                                                                 | ACS Energy Lett. 4 (2019) 2571.      |
| FTO/TiO <sub>2</sub> /QDs/spiro-OMeTAD/MoO <sub>x</sub> /Ag    | 12.40%        | - RH 20%, 25°C<br>- 90% retention for 22 day                                                                     | Nano Energy 66 (2019) 104130.        |
| FTO/TiO <sub>2</sub> /QDs/PTAA/MoO <sub>3</sub> /Ag            | 14.1%         | - RH 40%, 25°C<br>- 70% retention for 50 hour                                                                    | Adv. Energy Mater. 9 (2019) 1900721. |
| FTO/TiO <sub>2</sub> /QDs/PTB7 /MoO <sub>3</sub> /Ag           | 12.27%        | - RH 20~30%, 25°C<br>- 70% retention for 150 hour                                                                | J. Mater. Chem. A 7 (2019) 20936.    |
| ITO/SnO <sub>2</sub> /QDs/spiro-OMeTAD/Au                      | 9.6%          | - RH 50~70%, 25°C<br>- 40% retention for 4 day                                                                   | Nat. Energy 5 (2020) 79.             |
| FTO/TiO <sub>2</sub> /QDs/spiro-OMeTAD/Ag                      | 14.8%         | - RH 20~30%, 25°C<br>- 62% retention for 350 hour                                                                | Chem. Mater. 32 (2020) 6105.         |
| FTO/TiO <sub>2</sub> /QDs/QD:Polymer/PTAA/MoO <sub>3</sub> /Ag | 13.8%         | - RH 20~30%, 25°C<br>- 88% retention for 50 hour                                                                 | J. Mater. Chem. A 8 (2020) 8104.     |
| FTO/c-TiO <sub>2</sub> /QDs/spiro-OMeTAD/MoO <sub>x</sub> /Ag  | 14.10         | - RH 20~25%, 25°C<br>- 90% retention for 15 day                                                                  | Nano Energy 75 (2020) 104985         |
| Glass/FTO/TiO <sub>2</sub> /QDs/PTAA/MoO <sub>3</sub> /Ag      | 14.9%         | - RH 30~40%, 20-30°C<br>- 70% retention for 130 hour                                                             | Adv. Mater. 32 (2020) 2000449        |
| <b>Glass/FTO/TiO<sub>2</sub>/QDs/PTAA/MoO<sub>3</sub>/Ag</b>   | <b>14.25%</b> | <b>- RH 20~25%, 20-30°C<br/>- 60% retention for 30 day<br/>- RH 0~5%, 20-30°C<br/>- 75% retention for 67 day</b> | <b>This Work</b>                     |
